1 **TITLE**

2 High temporal resolution RNA-seq time course data reveals mammalian lncRNA activation  
3 mirrors neighbouring protein-coding genes  
4

5 **AUTHORS**

6 Walter Muskovic<sup>\*1,2</sup>, Eve Slavich<sup>3</sup>, Ben Maslen<sup>3</sup>, Dominik C. Kaczorowski<sup>4</sup>, Joseph  
7 Cursons<sup>5,6</sup>, Edmund Crampin<sup>7,8</sup> & Maria Kavallaris<sup>\*1,2</sup>

8 <sup>1</sup>Children's Cancer Institute, Lowy Cancer Research Centre, University of New South Wales,  
9 Sydney, New South Wales, Australia

10 <sup>2</sup>ARC Centre of Excellence in Convergent Bio-Nano Science and Technology, Australian  
11 Centre for NanoMedicine, University of New South Wales Australia, Sydney, New South  
12 Wales, Australia

13 <sup>3</sup>Stats Central, Mark Wainwright Analytical Centre, University of New South Wales, Sydney,  
14 New South Wales, Australia

15 <sup>4</sup>Garvan Institute of Medical Research, Sydney, New South Wales, Australia

16 <sup>5</sup>The Department of Biochemistry and Molecular Biology, Biomedicine Discovery Institute,  
17 Monash University, Clayton, Victoria, Australia

18 <sup>6</sup>Bioinformatics Division, The Walter and Eliza Hall Institute of Medical Research and  
19 Department of Medical Biology and Faculty of Medicine, Dentistry and Health Sciences,  
20 University of Melbourne, Parkville, Victoria, Australia

21 <sup>7</sup>Systems Biology Laboratory, School of Mathematics and Statistics and Department of  
22 Biomedical Engineering, University of Melbourne, Victoria, Australia

23 <sup>8</sup>ARC Centre of Excellence in Convergent Bio-Nano Science and Technology, Melbourne  
24 School of Engineering, University of Melbourne, Parkville, Victoria, Australia

25 <sup>\*</sup>Co-corresponding authors

29 **ABSTRACT**

30 **Background**

31 The advent of next-generation sequencing revealed extensive transcription beyond protein-  
32 coding genes, identifying tens of thousands of long non-coding RNAs (lncRNAs). Selected  
33 functional examples raised the possibility that lncRNAs, as a class, may maintain broad  
34 regulatory roles. Compellingly, lncRNA expression is strongly linked with adjacent protein-  
35 coding gene expression, suggesting a potential *cis*-regulatory function. Evidence for these  
36 regulatory roles may be obtained through careful examination of the precise timing of  
37 lncRNA expression relative to adjacent protein-coding genes.

38 **Results**

39 Where causal *cis*-regulatory relationships exist, lncRNA activation is expected to precede  
40 changes in adjacent target gene expression. Using an RNA-seq time course of uniquely high  
41 temporal resolution, we profiled the expression dynamics of several thousand lncRNAs and  
42 protein-coding genes in synchronized, transitioning human cells. Our findings reveal  
43 lncRNAs are expressed synchronously with adjacent protein-coding genes. Analysis of  
44 lipopolysaccharide-activated mouse dendritic cells revealed the same temporal relationship  
45 observed in transitioning human cells.

46 **Conclusion**

47 Our findings suggest broad-scale *cis*-regulatory roles for lncRNAs are not common. The  
48 strong association between lncRNAs and adjacent genes may instead indicate an origin as  
49 transcriptional by-products from active protein-coding gene promoters and enhancers.

50  
51 **KEYWORDS**

52 Long non-coding RNA, lncRNA, lncRNA function, lncRNA expression, lncRNA dynamics,  
53 RNA-seq, gene expression time course, gene expression time series, gene expression  
54 dynamics

57

1  
2 **58 BACKGROUND**  
3

4 59 Large-scale transcriptomic studies, enabled by improvements in total RNA enrichment and  
5

6 60 high-throughput RNA profiling technologies, unexpectedly revealed extensive transcription  
7

8 61 outside the boundaries of known protein-coding genes [1–5]. The class of products of this  
9

10 62 transcription are now known as long non-coding RNAs (lncRNAs). Throughout the human  
11

12 63 genome, tens of thousands of these transcripts have been accurately annotated [6,7].  
13

14 64 Despite their ubiquity, the biological significance of most lncRNAs remains unknown.  
15

16 65 Three consistently documented properties of these transcripts hint at widespread regulatory  
17

18 66 roles. Firstly, while lncRNA exon sequences are poorly conserved, their promoter region  
19

20 67 sequences are conserved at levels equivalent to protein-coding genes [3,6,8,9]. Second,  
21

22 68 lncRNAs display exquisite tissue specificity in their expression patterns [5,6,10]. Thirdly,  
23

24 69 lncRNA expression is often closely correlated with neighboring protein-coding genes, both in  
25

26 70 developing [11–13] and adult tissues [6,7,14]. Taken together, these observations indicate  
27

28 71 lncRNA transcription may promote activation of adjacent, tissue-specific protein-coding  
29

30 72 genes. Proposed mechanisms to support such broad-scale *cis*-regulatory roles are diverse  
31

32 73 [15–18].  
33

34 74 To test the hypothesis that lncRNAs are ubiquitous *cis*-regulators of gene expression we  
35

36 75 sought to accurately measure the timing of transcription, a relatively under-studied  
37

38 76 dimension of regulatory RNA activity. lncRNAs by their nature must be transcribed prior to  
39

40 77 any *cis*-regulatory role. As transcription is slow relative to the rapid activation of inducible  
41

42 78 transcription factors, changes in lncRNA expression are expected to precede changes in  
43

44 79 target gene expression. Indeed, the current limited investigations of lncRNA dynamics in  
45

46 80 transitioning mammalian cells indicate lncRNA production precedes activation of protein-  
47

48 81 coding genes [19–21].  
49

50 82 Here, we capture with unprecedented temporal resolution the dynamics of several thousand  
51

52 83 lncRNAs and protein-coding genes in transitioning human cells. Using these data, we  
53

54 84 demonstrate how differences in transcript production and stability have obscured the  
55

85 sequence of lncRNA and protein-coding gene activation. By accounting for these effects, the  
86 high temporal resolution of these data reveal the temporal hierarchy of lncRNA and protein-  
87 coding gene activation. Examination of the sequence of events provides insight into the  
88 feasibility of broad-scale *cis*-regulatory roles for lncRNAs.

89

## 90 **RESULTS**

### 91 **Capturing a dynamic transcriptome at high temporal resolution**

92 To capture lncRNA and protein-coding gene transcription dynamics at high temporal  
93 resolution, a reliable method to obtain a homogeneous, synchronized cell population was  
94 required. To achieve this, we took advantage of the unique growth characteristics of the  
95 immortalized human glioblastoma cell line T98G. T98G cells retain growth arrest  
96 mechanisms characteristic of untransformed cells [22]. In response to growth factor  
97 deprivation, T98G cells undergo reversible G<sub>0</sub>/G<sub>1</sub> cell cycle arrest. Serum stimulation is  
98 sufficient to induce exit from growth arrest, producing a population of tightly synchronized  
99 cycling cells, without the need for drug treatment [23–25]. Following stimulation, the  
100 transition from quiescence to active cell division is characterized by the induction of a  
101 complex transcriptional cascade involving protein synthesis-independent induction of  
102 immediate early genes, followed by synthesis-dependent secondary response genes [23].  
103 To capture this transcriptional program at high temporal resolution, synchronized  
104 transitioning T98G cells were sampled at 10-minute intervals, from 0 minutes (unstimulated)  
105 to 400 minutes (Fig. 1a).

106 To obtain gene expression estimates, rRNA-depleted total RNA-seq was performed for all  
107 time points. Examination of genome-aligned sequencing reads revealed a large number of  
108 lncRNAs were missing from existing genome annotations. To overcome this, *de novo*  
109 transcriptome assembly was performed (see Methods), identifying 2803 lncRNAs in addition  
110 to 3552 protein-coding genes activated in response to serum stimulation. Of the identified  
111 lncRNAs, 33.2% had no overlap with either GENCODE [6] or FANTOM CAT [7] annotated

112 lncRNA transcripts. Notably, many lncRNAs exhibited a rapid increase in expression,  
113 peaking within the first 100 minutes of stimulation, followed by an equally rapid decrease in  
114 expression (Fig. 1b). In contrast, protein-coding mRNAs displayed more gradual dynamics,  
115 with most mRNAs accumulating progressively throughout the time course (Fig. 1c). To  
116 directly compare lncRNA and mRNA expression dynamics, we examined the correlation  
117 between the prototypical responses displayed by the two transcript classes (Fig. 1d).  
118 Notably, coding genes lacked the early rapid response exhibited by most lncRNAs,  
119 consistent with previous observations of lncRNAs preceding the expression of protein-coding  
120 genes in transitioning mammalian cells [19–21].  
121 However, we noted activated protein-coding genes were significantly longer than the class of  
122 lncRNAs (Supplementary Fig. 1). Longer transcription times could introduce delays in  
123 mature mRNA accumulation. Protein-coding mRNA half-lives are also known to vary over a  
124 wide range, while lncRNAs are generally rapidly degraded by the RNA exosome [26,27]. The  
125 combination of gene length and mRNA stability may mask the time of transcription initiation  
126 of protein coding genes (gene activation), impeding accurate comparison with lncRNA  
127 activation dynamics. To determine if these effects were obscuring the true protein-coding  
128 gene induction times, we next examined the contributions of these two factors to mRNA  
129 expression dynamics.

### 130 **Transcript stability shapes mRNA expression dynamics**

131 To gain a quantitative understanding of the effect of transcript stability on measured mRNA  
132 dynamics we adapted a mathematical model of the transcriptional response proposed by  
133 Zeisel et al [28] (see Methods), in which the rate of change of mRNA concentration is  
134 determined by a balance between mRNA degradation and the production of new mRNA  
135 from unspliced precursor-mRNA (pre-mRNA). RNA-seq reads originating from intronic  
136 regions and captured in total RNA-seq have been demonstrated to serve as a useful proxy  
137 for nascent transcription [29,30] and were used to estimate pre-mRNA concentration. Time-  
138 invariant splicing and degradation rates were selected that minimized the deviation between

139 model predictions of mRNA concentration relative to measured levels. This model provided a  
1 close fit to observed expression dynamics (Fig. 2a-g), enabling estimation of transcript-  
2 140 close fit to observed expression dynamics (Fig. 2a-g), enabling estimation of transcript-  
3  
4 141 specific half-lives (Fig. 2h).  
5

6 142 Genes with relatively unstable mRNA largely recapitulated pre-mRNA dynamics with a short  
7  
8 143 time lag. In contrast, longer mRNA half-lives resulted in expression dynamics increasingly  
9  
10 144 divergent from the transient precursor. These results suggest that for genes encoding stable  
11  
12 145 transcripts, mRNA expression profiles serve as a poor indicator of underlying gene induction  
13  
14 146 dynamics. Furthermore, the confounding effect of transcript stability can be avoided by  
15  
16 147 measuring pre-mRNA expression dynamics for each mRNA transcript through quantification  
17  
18 148 of intron-mapping RNA fragments.  
19  
20

### 21 149 **Gene length introduces RNA production delays**

22  
23  
24  
25 150 Human gene length varies over a wide range (Supplementary Fig. 1). Protein-coding genes  
26  
27 151 identified in this study ranged from less than a kb to more than a Mb in length, with a mean  
28  
29 152 length of 51.8 kb. In contrast, lncRNAs were observed to be significantly shorter than most  
30  
31 153 protein-coding genes, consistent with previous annotations [6,7,10] with a mean length of  
32  
33 154 16.6Kb (Supplementary Fig. 1). The time required for Pol II to complete transcript elongation  
34  
35 155 may delay the production of mature mRNA. These effects are expected to be more  
36  
37 156 pronounced for longer genes. This was seen to be the case for the *CACNA1C* gene (Fig.  
38  
39 157 3a). Visualization of RNA-seq coverage over intronic regions revealed a progressive wave of  
40  
41 158 transcription across the length of the 645 kb gene. Mature mRNA production is  
42  
43 159 correspondingly observed to be delayed by several hours (Fig. 3b). Examination of shorter  
44  
45 160 genes revealed consistent delays in mRNA production due to transcription time (Fig. 3c-e).  
46  
47  
48  
49  
50 161 From these data we estimated transcription elongation to precede at a rate of approximately  
51  
52 162 2.5 kb/min (Supplementary Fig. 2), in line with previous estimates [31–33]. Assuming this  
53  
54 163 constant rate, the time required to complete transcription elongation of an average length  
55  
56 164 protein-coding gene is approximately 21 minutes. These results suggest mature mRNA  
57  
58 165 expression profiles may be a poor indicator of induction dynamics, particularly for long  
59  
60  
61  
62  
63  
64  
65

166 genes. Further, to negate the effects of transcription delays due to gene length, RNA-seq  
167 reads originating from the 5' end of a gene's pre-mRNA would be most suitable for  
168 determining the timing of gene activation.

### 169 **mRNA expression masks underlying gene induction dynamics**

170 Taken together, our findings suggest the combined effects of gene length and transcript-  
171 specific degradation rates may combine to mask protein-coding gene induction dynamics. To  
172 remove the contributions of these effects, gene expression profiles were quantified for all  
173 protein-coding and lncRNA transcripts using only the expression of the first 10 kb of intron  
174 sequence. Pre-mRNA profiles (Fig. 4a) revealed protein-coding gene activation is  
175 significantly more rapid than indicated by mature mRNA expression levels (Fig. 1c). Within  
176 each pre-mRNA expression cluster, genes were ordered by their mRNA expression  
177 dynamics (Fig. 4b). Genes with similar pre-mRNA profiles produced a broad range of mature  
178 mRNA dynamics, suggesting the combined effects of gene length and transcript stability  
179 shape protein-coding gene expression dynamics.

180 We next compared the prototypical responses revealed by pre-mRNA with the expression  
181 profiles characteristic of lncRNAs (Fig. 4c). In contrast to the relationship implied by mature  
182 mRNA expression (Fig. 1d), pre-mRNA dynamics revealed the rapid responses exhibited by  
183 lncRNAs are also observed for the induction of protein-coding genes.

### 184 **lncRNAs mirror adjacent protein-coding gene expression**

185 Having identified that lncRNAs and protein-coding genes exhibit similar dynamics, we next  
186 sought to examine the spatial relationship between lncRNAs and the expression profiles of  
187 adjacent protein-coding genes. Before examining the genome-wide relationship, we focused  
188 in detail on three well-studied genes activated early in the release from cell cycle arrest (Fig.  
189 5).

190 We first considered the proto-oncogene *FOS*. Following serum stimulation, canonical  
191 mitogen-activated protein kinase signaling triggers rapid transcription of immediate early



192 genes, including *FOS* [34]. The encoded transcription factor subunit, c-Fos, dimerizes with c-  
193 Jun to form the transcriptional activator AP-1, stimulating further downstream transcriptional  
194 changes. Examination of RNA-seq data from the *FOS* locus revealed rapid and transient  
195 transcription of *FOS* and two adjacent lncRNAs. Both lncRNAs were associated with regions  
196 of increased nuclease sensitivity, revealed by a strong DNase-seq signal across diverse  
197 human tissues (Fig. 5a). These regions also overlapped H3K4me1 and H3K4me3 histone  
198 marks characteristic of enhancer regions [35,36]. The expression profiles of both lncRNAs  
199 were captured and compared with the adjacent protein-coding *FOS*. Despite the rapid  
200 dynamics exhibited within this group, the high temporal resolution of the RNA-seq time  
201 series allowed *FOS* pre-mRNA and mRNA dynamics to be separated. Both lncRNAs were  
202 found to mirror the expression dynamics of *FOS* pre-mRNA (Fig. 5d).

203 We next considered *TGFBI*, which encodes an excreted extracellular matrix protein involved  
204 in cell adhesion and migration (Fig. 5b). In contrast to the transient dynamics of *FOS*, *TGFBI*  
205 exhibited gradual accumulation and increased separation of pre-mRNA and mature mRNA  
206 expression profiles (Fig. 5e). Four lncRNAs were identified, clustered upstream of *TGFBI*.  
207 Transcription was observed to overlap enhancer-associated chromatin marks. As was  
208 observed for *FOS*, comparison of expression dynamics revealed that lncRNA expression  
209 mirrored the activation of the adjacent protein coding gene (Fig. 5e).

210 As a third example, we examined the dynamics of the well-studied transcription factor gene  
211 *TGIF1*, which mediates a critical role in attenuating transforming growth factor beta pathway  
212 signaling [37]. In addition to the lncRNA antisense to *TGIF1*, two lncRNAs were identified  
213 more than 100 kb downstream (Fig. 5c). All lncRNAs overlapped chromatin marks, of  
214 variable signal intensity, characteristic of enhancer regions. Consistent with *FOS* and *TGFBI*,  
215 analysis of the expression dynamics revealed all lncRNAs mirrored the activation of *TGIF1*  
216 (Fig. 5f).

217 **Protein-coding and lncRNA expression correlation is genome-wide and exhibits**  
218 **synchrony**



219 Close examination of *FOS*, *TGFB1* and *TGIF1* identified adjacent lncRNAs that mirror  
1  
2 220 protein-coding gene activation. To assess the generality of this phenomenon in our data, we  
3  
4 221 next examined the relationship between distance and similarity in expression between all  
5  
6 222 3552 protein-coding genes and 2803 lncRNAs activated across the human genome.  
7  
8 223 Consistent with observations of individual genes, lncRNAs and protein-coding genes  
9  
10 224 exhibited increasing correlation with increasing genomic proximity (Fig. 6a). As a similar  
11  
12 225 trend is observed within the two transcript classes (Supplementary Fig. 3), a block bootstrap  
13  
14 226 approach was employed (see Methods) to assess uncertainty around the trend between  
15  
16 227 distance and correlation observed between the two transcript classes. Strong deviation of  
17  
18 228 the trend (GAM fit) from the obtained confidence intervals suggests that associations  
19  
20 229 between the expression of lncRNAs and adjacent protein-coding genes is generalizable  
21  
22 230 across our data. To determine whether this trend was consistent between lncRNAs uniquely  
23  
24 231 identified in this study (930) and lncRNAs overlapping existing annotations (1873), the  
25  
26 232 analysis was repeated separately for each group of lncRNAs. The trend between lncRNAs  
27  
28 233 and adjacent protein-coding genes was observed in both groups (Supplementary Fig. 4).  
29  
30  
31  
32  
33  
34 234 Having identified a genome-wide association between protein-coding gene and adjacent  
35  
36 235 lncRNA expression, we next sought to examine the sequence of events. To determine  
37  
38 236 whether lncRNA expression precedes or trails the activation of adjacent genes, time-lagged  
39  
40 237 lncRNA expression profiles were compared with protein-coding pre-mRNA expression (Fig.  
41  
42 238 6b). Correlation between lncRNA and protein-coding expression profiles was found to be  
43  
44 239 maximal with a lag of 0 minutes. These results suggest lncRNA expression and coding gene  
45  
46 240 activation are approximately synchronous, consistent with the observations of individual  
47  
48 241 lncRNA-gene pairs (Fig. 5d-f). In contrast, when lncRNA and coding gene dynamics were  
49  
50 242 compared using mature mRNA expression, lncRNA expression appeared to significantly  
51  
52 243 precede protein-coding gene activation (Fig. 6c). These findings highlight the utility of  
53  
54 244 measuring 5' intron expression to capture gene activation dynamics and provide a possible  
55  
56  
57  
58  
59  
60  
61  
62  
63  
64  
65

245 explanation for the previously reported finding that transcription of lncRNAs precedes  
1  
2 246 protein-coding gene expression [19–21].  
3

#### 4 247 **Murine lncRNAs mirror adjacent protein-coding gene expression** 5 6

7 248 In the T98G time series data, simultaneous initiation of lncRNA and adjacent protein-coding  
8  
9 249 expression is consistent across the human genome. To evaluate whether this is also the  
10  
11 250 case in the mouse genome, we examined an RNA-seq time series capturing the immune  
12  
13 251 response of mouse dendritic cells to lipopolysaccharide (LPS) captured at 15 minute time  
14  
15 252 intervals, from 0 to 180 minutes [38]. To identify mouse lncRNAs, *de novo* transcriptome  
16  
17 253 assembly was again performed (see Methods), identifying 1275 lncRNAs and 2882 protein-  
18  
19 254 coding genes activated in response to LPS stimulation. Of the identified lncRNAs, 34.4%  
20  
21 255 had no overlap with GENCODE-annotated lncRNA transcripts.  
22  
23  
24

25  
26 256 Consistent with lncRNAs examined in the human T98G time series dataset, mouse lncRNA  
27  
28 257 expression was significantly associated with activation of adjacent protein-coding genes (Fig.  
29  
30 258 7a). Comparing lagged lncRNA gene expression with nearby protein-coding expression  
31  
32 259 profiles, measured using 5' intron expression, correlation was again found to be maximal  
33  
34 260 with a time lag of 0 minutes (Fig. 7b). These results suggest synchronous, spatially  
35  
36 261 correlated lncRNA and protein coding gene activation is a general phenomenon in  
37  
38 262 transitioning mammalian cells.  
39  
40  
41

42 263

#### 44 264 **DISCUSSION** 45

46 265 Our findings establish a robust relationship between lncRNAs and the expression of adjacent  
47  
48 266 protein-coding genes. Through genome-wide comparison of lncRNA and coding-gene  
49  
50 267 activation dynamics we have demonstrated that, within the temporal resolution of our  
51  
52 268 measurements, lncRNA and protein-coding gene activation appears to be synchronous.  
53  
54  
55

56 269 This observation contrasts with previous reports identifying lncRNA expression to precede  
57  
58 270 activation of protein-coding genes in transitioning mammalian cells [19–21]. Our findings  
59  
60  
61

271 suggest this discrepancy may be attributed to the reliance of previous investigations on  
1 measurement of mature mRNA to capture gene expression. We have shown that gene  
2 272  
3 length introduces considerable delays in mRNA accumulation. When combined with  
4 273  
5 differences in transcript stability, our results indicate mRNA levels are an unreliable indicator  
6 274  
7 of gene activation times. In contrast, we have demonstrated that measurement of pre-mRNA  
8 275  
9 expression levels from RNA-seq data reliably captures the timing of gene activation.  
10 276

11 277 Reports of delays between lncRNA and mRNA transcription have been interpreted as  
12  
13 evidence supporting functional roles for lncRNAs as pervasive transcriptional regulators  
14 278  
15 [20,21,39]. This reasoning is consistent with non-coding transcripts that must be transcribed  
16 279  
17 prior to any regulatory activity. Where functional regulatory relationships exist, rapid lncRNA  
18 280  
19 expression is expected to occur in advance of changes in target gene expression. Our  
20 281  
21 findings indicate that, with an average length of 16.6 kb and transcription elongation rate of  
22 282  
23 2.5 kb/min, a typical lncRNA would take 6.6 minutes to be transcribed, excluding the time  
24 283  
25 required for recruitment of regulatory complexes or other proposed functions. The high  
26 284  
27 temporal resolution of the time courses described in this study did not reveal such a delay.  
28 285  
29 Instead, lncRNA and protein-coding gene activation appear to be synchronous.  
30 286  
31

32 287 These findings do not support the existence of broad-scale *cis*-regulatory roles for lncRNAs.  
33  
34 288 Both human and mouse lncRNAs identified in this study arise as transient, low-abundance  
35  
36 transcription mirroring adjacent gene activation. These observations are consistent with  
37 289  
38 proposals that the majority of lncRNAs may represent the non-specific initiation of  
39 290  
40 transcription at active regulatory elements [40–42]. Indeed, our findings indicate lncRNAs  
41 291  
42 are associated with chromatin marks characteristic of enhancer elements. This close  
43 292  
44 association of lncRNAs with active enhancers may clarify several observations widely  
45 293  
46 construed as suggestive of biological function. These include the widespread sequence  
47 294  
48 conservation of lncRNA promoter regions [3,6,8,9], strong cell-type and developmental-  
49 295  
50 stage-specific expression [5,6,10] and phenotypic changes observed following ablation of  
51 296  
52 lncRNA loci [43–45]. Sequence conservation of enhancer regions and their regulation of cell-  
53 297  
54  
55  
56  
57  
58  
59  
60  
61  
62  
63  
64  
65

298 type-specific transcriptional control are well-documented [36,46]. Conservation of sequence  
1 immediately adjacent to lncRNA transcription start sites, previously viewed as lncRNA  
2 promoters, may alternatively be interpreted as conserved enhancer regions. Similarly, the  
3  
4 300 characteristic tissue-restricted expression of lncRNAs may reflect activity of the adjacent  
5  
6 301 enhancer. Phenotypes observed following ablation of lncRNA loci may equally be due to loss  
7  
8 302 of underlying regulatory DNA regions, as was recently observed to be the case for a number  
9  
10 303 of zebrafish lncRNAs [47]. Similarly, two recent investigations employing insertion of  
11  
12 304 transcriptional terminator sequences to separate the role of the genomic locus from its RNA  
13  
14 305 products reached similar conclusions [16,48]. In both cases, *cis* elements were identified as  
15  
16 306 functional, whereas the associated lncRNAs were dispensable.  
17  
18 307

22  
23 308 Importantly, while our observations are consistent with an origin of lncRNAs as  
24  
25 309 transcriptional by-products, they do not preclude potential *trans*-regulatory functions  
26  
27 310 unrelated to activation of adjacent gene expression. These findings also provide an  
28  
29 311 additional criterion by which future studies may distinguish subsets of functional non-coding  
30  
31 312 RNAs. Transcripts that do not originate as transcriptional by-products should be transcribed  
32  
33 313 independent of the activity of neighboring protein-coding gene loci. Further research is  
34  
35 314 required to determine whether independently-regulated lncRNAs are associated with  
36  
37 315 characteristics such as localization with chromatin-associated or gene-silencing factors,  
38  
39 316 increased abundance, stability or sequence-level conservation that may indicate a subset of  
40  
41 317 functional lncRNAs.  
42  
43 318

## 48 319 **METHODS**

### 51 320 **Cell culture and RNA extraction**

52  
53 321 Human glioblastoma T98G cells obtained from the American Type Culture Collection were  
54  
55 322 cultured in Gibco Dulbecco's Modified Eagle Medium (DMEM) supplemented with 10% fetal  
56  
57 323 calf serum (FCS) at 37°C in humidified atmosphere with 5% CO<sub>2</sub>. For each time point two  
58  
59 324 million cells were seeded and allowed to equilibrate for 24 hours, followed by a 72 hour  
60  
61  
62  
63  
64  
65

1  
2 326 incubation in serum-free DMEM. Cells were stimulated with 20%FCS/DMEM at specified  
3  
4 327 time points, lysed with TRIzol reagent (Ambion), homogenized and frozen for subsequent  
5  
6 328 RNA isolation. RNA extraction and purification was performed using a miRNeasy Mini Kit  
7  
8 and RNase-free DNase (Qiagen).

### 9 329 **RNA-sequencing**

10  
11 330 RNA samples were depleted of ribosomal RNA (rRNA) using Ribo-Zero biotinylated, target-  
12  
13 331 specific oligos (Illumina) combined with RNAClean XP beads (Beckman Coulter). Following  
14  
15 332 purification, rRNA-depleted samples were prepared for sequencing using an Illumina TruSeq  
16  
17 333 Stranded Total RNA library prep kit. After individual library QC, the sample pool size and  
18  
19 334 concentration were determined using a LabChip GX DNA High Sensitivity assay and qPCR  
20  
21 335 using a KAPA Library Quantification Kit (Roche). Uniquely indexed samples were pooled in  
22  
23 336 equimolar concentration, diluted and denatured as one, clustered across eight flow cell lanes  
24  
25 337 and sequenced at 125 bp paired-end resolution using an Illumina HiSeq 2500 v4.0  
26  
27 338 sequencing system to provide a mean sequencing depth of 37.2 million reads per time point  
28  
29 339 sample.  
30

### 31 340 **Bioinformatic analysis**

32  
33 341 In addition to the descriptions provided below, all code used to produce the presented  
34  
35 342 analyses and figures, along with links to external data sets are provided in the associated  
36  
37 343 GitHub repository [https://github.com/WalterMuskovic/lncRNA\\_time\\_course](https://github.com/WalterMuskovic/lncRNA_time_course).  
38  
39

### 40 344 **RNA-sequencing data analysis**

41  
42 345 Sequencing data for the mouse dendritic cell LPS response time course were obtained from  
43  
44 346 NCBI GEO accession GSE56977. A detailed description of the sample preparation and  
45  
46 347 sequencing can be found in the associated publication[38]. Both human glioblastoma T98G  
47  
48 348 and mouse time course reads were trimmed to remove Illumina adapter sequences, with  
49  
50 349 cutadapt, version 1.11 [49]. Trimmed reads were aligned to the GRCh38 and GRCm38  
51  
52 350 primary genome assemblies using STAR [50], version 2.5.2a. Aligned reads from all  
53  
54 351 timepoints were combined for *de novo* transcriptome assembly with StringTie, version 2.1.3.  
55  
56 352 Read counts were then quantified for each timepoint using the Rsubread R package [51],  
57  
58  
59  
60  
61  
62  
63  
64  
65

353 version 1.34.6. Counts were normalized using the median of ratios method implemented in  
1  
2 354 the DESeq2 R package [52], version 1.24.0. To identify human and mouse genes activated  
3  
4 355 in response to serum stimulation, each gene was tested for autocorrelation using a Ljung–  
5  
6 356 Box test with the stats R package, version 4.0.2. Genes with an adjusted  $p$ -value cut-off  
7  
8 357 below 0.01 were retained, following correction for multiple-testing with Benjamini-Hochberg  
9  
10 358 adjustment. To assist visualization, protein-coding genes and lncRNAs with similar  
11  
12 359 expression profiles were grouped by K-means cluster analysis. To determine the optimal  
13  
14 360 cluster number ( $k$ ), the total within-cluster sum of squares (WSS) was calculated for a range  
15  
16 361 of values of  $k$ . Examining a curve of WSS according to the number of clusters  $k$ , a value was  
17  
18 362 chosen such that adding additional clusters did not greatly reduce the total intra-cluster  
19  
20 363 variation. For all transcript classes a value of  $k=6$  was determined to be appropriate.  
21  
22  
23

#### 24 364 **Inference of transcript-specific half-lives**

25  
26 365 Following the method described by Zeisel et al [28], we model transcription dynamics with  
27  
28 366 the following differential equation:  
29  
30

$$31 \quad \frac{dM}{dt} = \beta P(t) - \alpha M(t)$$

32 367 in which the rate change in mRNA concentration ( $\frac{dM}{dt}$ ) corresponds to the balance between  
33  
34 368 transcription and degradation.  $\beta$  denotes the splicing rate coefficient of the pre-mRNA  $P(t)$   
35  
36 369 to mature mRNA  $M(t)$ , which degrades at a rate captured by  $\alpha$ . Transcript-specific mRNA  
37  
38 370 half-lives are given by  $T_{1/2} = \frac{\ln 2}{\alpha}$ . To determine the time-invariant model parameters ( $\beta$  and  
39  
40 371  $\alpha$ ), normalized mRNA and pre-mRNA counts were fit using least squares. To minimize the  
41  
42 372 effects of transcription delays due to gene length, pre-mRNA expression was captured using  
43  
44 373 only reads mapped to the last 10 kb of a gene's introns. Model parameters were selected as  
45  
46 374 those minimizing the difference between model predictions of mRNA dynamics relative to  
47  
48 375 measured levels.  
49  
50 376  
51  
52  
53  
54

#### 55 377 **Impulse model fits to time course data**

56 378 To assist with visualization, lines were fit to the pre-mRNA profiles presented in the upper  
57  
58 379 panels of Fig. 2 and the first/last 10 kb of pre-mRNA presented in Fig. 3. Fits were obtained  
59  
60  
61  
62  
63  
64  
65

380 using the parametric impulse model described by Chechik and Koller [53], designed to  
381 capture gene expression responses that exhibit an abrupt early response before settling at a  
382 second steady-state level. The six-parameter model function described by Chechik and  
383 Koller:

$$f(t) = \frac{1}{h_1} \left( h_0 + (h_1 - h_0) \times \frac{1}{1 + e^{-\lambda(t-t_1)}} \right) \times \left( h_2 + (h_1 - h_2) \times \frac{1}{1 + e^{\lambda(t-t_2)}} \right)$$

384 describes two transitions, both with the same slope, captured by  $\lambda$ . We generalized the  
385 model slightly to allow two transitions with different slopes, defined by  $\lambda_1$  and  $\lambda_2$ :

$$f(t) = \frac{1}{h_1} \left( h_0 + (h_1 - h_0) \times \frac{1}{1 + e^{-\lambda_1(t-t_1)}} \right) \times \left( h_2 + (h_1 - h_2) \times \frac{1}{1 + e^{\lambda_2(t-t_2)}} \right)$$

388 Optimal model parameters were determined by least squares, minimizing the sum of  
389 squared error between the impulse model fit and measured pre-mRNA levels.

#### 390 **Roadmap Epigenomics Project DNase/ChIP-seq data**

391 DNase-seq and histone modification ChIP-seq data for GRCh38 genomic regions were  
392 obtained from the NIH Roadmap Epigenomics Project [54]. Data from genomic regions of  
393 interest were extracted from genome-wide  $-\log_{10}(\text{p-value})$  signal tracks containing uniformly  
394 processed data from 111 consolidated epigenomes, representing a diverse range of human  
395 cell types and tissues [36].

#### 396 **Block bootstrap**

397 We sought to assess whether coding/lncRNA pairs that are close together are more  
398 correlated in their expression profiles than would be expected by chance by plotting a  
399 simulation envelope around the relationship between Pearson's correlation and separation  
400 distance to show the 1<sup>st</sup> and 99<sup>th</sup> percentiles under the null hypothesis. If the trend is outside  
401 the simulation envelope then it indicates there is a relationship between the two that is  
402 beyond what is expected by chance. A naive method for the simulation envelope involves  
403 creating pseudo samples by randomly permuting the separation distances (but not the  
404 Pearson's correlations) and using these to recreate the "null" trend- where coding/lncRNA  
405 correlation and separation distance are not correlated. However, both classes of transcripts  
406 are spatially correlated (Supplementary Figure 3) and naive permutation would ignore this



407 dependence. Hence a block bootstrap approach was employed to create the pseudo  
1  
2 408 samples for the simulation envelope [55]. To perform the block bootstrap, pseudo-  
3  
4 409 chromosomes were created by splitting chromosomes into sublengths of a determined block  
5  
6 410 size for each transcript class. Sublengths were then sampled with replacement to obtain the  
7  
8 411 pseudo-chromosomes, with a GAM subsequently fit to the trend in Pearson's correlation  
9  
10 412 versus separation distance on all the coding/lncRNA pairs in the pseudo- chromosome. A  
11  
12 413 simulation envelope was obtained by taking the 1<sup>st</sup> and 99<sup>th</sup> percentiles from 1000 iterations  
13  
14 414 of the block bootstrap. A schematic of the method along with the code used to implement it  
15  
16 415 is provided in the accompanying GitHub repository. To determine the appropriate block size  
17  
18 416 for each transcript class, separation distances were randomly shuffled 1000 times and  
19  
20 417 generalized additive models (GAM) were fit to the relationship between distance and  
21  
22 418 correlation to obtain 1<sup>st</sup> and 99<sup>th</sup> quantiles. The distance at which the GAM fit to the  
23  
24 419 unpermuted data exceeded the 99<sup>th</sup> quantile was taken as the block size, so that the  
25  
26 420 expression profiles between sublengths of chromosome could be considered approximately  
27  
28 421 independent.

### 33 422 **Cross-correlation**

34  
35 423 The ccf function from the R stats package, version 3.6.1, was used to compute the cross  
36  
37 424 correlation between lncRNA and coding expression profiles, with time lags ranging from -200  
38  
39 425 to 200 minutes for the T98G time course and -90 to 90 minutes for the mouse LPS time  
40  
41 426 course. The lncRNA expression profile is lagged, while the coding gene expression profile is  
42  
43 427 held constant. To negate any effects of transcription delays due to gene length or transcript  
44  
45 428 half-lives, coding gene pre-mRNA and lncRNA expression was calculated using only the first  
46  
47 429 10 kb of intron regions. The mean was taken for all coding/lncRNA pairs within the specified  
48  
49 430 separation distance. To gain an estimate of uncertainty in the trend (accounting for  
50  
51 431 autocorrelation in expression profiles along the chromosome), the above procedure was  
52  
53 432 repeated 1000 times on pseudo-chromosomes generated using the block bootstrap method,  
54  
55 433 from which the 1<sup>st</sup>-99<sup>th</sup> quantiles were obtained in each separation distance category.  
56  
57  
58  
59  
60  
61  
62  
63  
64  
65

435 **DECLARATIONS**

1  
2 436 **Ethics approval and consent to participate**

3  
4 437 Not applicable.

5  
6 438 **Consent for publication**

7  
8 439 Not applicable.

9  
10  
11 440 **Availability of data and materials**

12  
13 441 All data and software used to produce the analyses presented in this work are publicly  
14  
15 442 available. Human glioblastoma T98G RNA-seq time course data have been made available  
16  
17 443 under accession GSE138662. Mouse LPS time course data were obtained from accession  
18  
19 444 GSE56977. All code used to produce the analysis presented in this work are available in the  
20  
21 445 GitHub repository [https://github.com/WalterMuskovic/lncRNA\\_time\\_course](https://github.com/WalterMuskovic/lncRNA_time_course).

22  
23  
24 446 **Competing interests**

25  
26 447 The authors declare no competing interests.

27  
28  
29 448 **Funding**

30  
31 449 National Health and Medical Research (Program Grant APP1091261 and Principal  
32  
33 450 Research Fellowship APP1119152 to MK). MK and EC are also supported by Australian  
34  
35 451 Research Council Centre of Excellence in Convergent Bio-Nano Science and Technology  
36  
37 452 (CE140100036). WM was also supported through an Australian Government Research  
38  
39 453 Training Program Scholarship, Kids Cancer Alliance PhD Top up scholarship and Brain  
40  
41 454 Foundation Research award.

42  
43  
44 455 **Authors' contributions**

45  
46 456 W.M. conceived and planned the project, carried out the in vitro experiments, performed the  
47  
48 457 computational analysis and wrote the manuscript. E.S. devised the methods for analysis of  
49  
50 458 spatial correlation and the block bootstrap. B.M. provided critical input on the analysis of  
51  
52 459 cross-correlation and consulted on the implementation of the block bootstrap method. D.K.  
53  
54 460 performed the RNA-seq library preparation and sequencing. J.C. and E.C. provided input on  
55  
56 461 the bioinformatics analyses and contributed to manuscript revisions. M.K. supervised the  
57  
58  
59  
60  
61  
62  
63  
64  
65

462 project, co-planned experiments, provided critical discussion of the study and contributed to  
1  
2 463 manuscript revisions.  
3

#### 4 464 **Acknowledgements** 5

6 465 This work was supported by the Children’s Cancer Institute, which is affiliated with the  
7  
8 466 University of New South Wales (UNSW Sydney), and the Sydney Children’s Hospital  
9  
10 467 Network. We would like to acknowledge and thank the donor from whom the glioblastoma  
11  
12 468 T98G cell line used to generate the RNA-seq data described in this publication was derived.  
13  
14 469 We would also like to acknowledge members of the NIH Roadmap Epigenomics Mapping  
15  
16 470 Consortium for generating the described human epigenomics data.  
17  
18  
19

#### 20 471 21 472 **REFERENCES** 22

- 23 473 1. Kapranov P, Cawley SE, Drenkow J, Bekiranov S, Strausberg RL, Fodor SPA, et al.  
24  
25 474 Large-Scale Transcriptional Activity in Chromosomes 21 and 22. *Science* (80- ).  
26  
27 475 2002;296:916 LP – 919.  
28  
29 476 2. Okazaki Y, Furuno M, Kasukawa T, Adachi J, Bono H, Kondo S, et al. Analysis of the  
30  
31 477 mouse transcriptome based on functional annotation of 60,770 full-length cDNAs. *Nature*.  
32  
33 478 2002;420:563–73.  
34  
35 479 3. Carninci P, Kasukawa T, Katayama S, Gough J, Frith MC, Maeda N, et al. The  
36  
37 480 transcriptional landscape of the mammalian genome. *Science*. American Association for the  
38  
39 481 Advancement of Science; 2005;309:1559–63.  
40  
41 482 4. Birney E, Stamatoyannopoulos JA, Dutta A, Guigó R, Gingeras TR, Margulies EH, et al.  
42  
43 483 Identification and analysis of functional elements in 1% of the human genome by the  
44  
45 484 ENCODE pilot project. *Nature*. Nature Publishing Group; 2007;447:799–816.  
46  
47 485 5. Djebali S, Davis CA, Merkel A, Dobin A, Lassmann T, Mortazavi A, et al. Landscape of  
48  
49 486 transcription in human cells. *Nature*. Nature Publishing Group; 2012;489:101–8.  
50  
51 487 6. Derrien T, Johnson R, Bussotti G, Tanzer A, Djebali S, Tilgner H, et al. The GENCODE v7  
52  
53 488 catalog of human long noncoding RNAs: analysis of their gene structure, evolution, and  
54  
55 489 expression. *Genome Res*. Cold Spring Harbor Laboratory Press; 2012;22:1775–89.  
56  
57  
58  
59  
60  
61  
62  
63  
64  
65

- 1  
2  
3  
4  
5  
6  
7  
8  
9  
10  
11  
12  
13  
14  
15  
16  
17  
18  
19  
20  
21  
22  
23  
24  
25  
26  
27  
28  
29  
30  
31  
32  
33  
34  
35  
36  
37  
38  
39  
40  
41  
42  
43  
44  
45  
46  
47  
48  
49  
50  
51  
52  
53  
54  
55  
56  
57  
58  
59  
60  
61  
62  
63  
64  
65
- 490 7. Hon C-C, Ramilowski JA, Harshbarger J, Bertin N, Rackham OJL, Gough J, et al. An atlas  
491 of human long non-coding RNAs with accurate 5' ends. *Nature*. Nature Publishing Group;  
492 2017;543:199–204.
  - 493 8. Guttman M, Amit I, Garber M, French C, Lin MF, Feldser D, et al. Chromatin signature  
494 reveals over a thousand highly conserved large non-coding RNAs in mammals. *Nature*.  
495 Nature Publishing Group; 2009;458:223–7.
  - 496 9. Chen J, Shishkin AA, Zhu X, Kadri S, Maza I, Guttman M, et al. Evolutionary analysis  
497 across mammals reveals distinct classes of long non-coding RNAs. *Genome Biol. BioMed*  
498 *Central Ltd.*; 2016;17.
  - 499 10. Cabili MN, Trapnell C, Goff L, Koziol M, Tazon-Vega B, Regev A, et al. Integrative  
500 annotation of human large intergenic noncoding RNAs reveals global properties and specific  
501 subclasses. *Genes Dev. Cold Spring Harbor Laboratory Press*; 2011;
  - 502 11. Herriges MJ, Swarr DT, Morley MP, Rathi KS, Peng T, Stewart KM, et al. Long  
503 noncoding RNAs are spatially correlated with transcription factors and regulate lung  
504 development. *Genes Dev. Cold Spring Harbor Laboratory Press*; 2014;28:1363–79.
  - 505 12. Sarropoulos I, Marin R, Cardoso-Moreira M, Kaessmann H. Developmental dynamics of  
506 lncRNAs across mammalian organs and species. *Nature*. Nature Publishing Group; 2019;1.
  - 507 13. Ponjavic J, Oliver PL, Lunter G, Ponting CP. Genomic and transcriptional co-localization  
508 of protein-coding and long non-coding RNA pairs in the developing brain. *PLoS Genet.*  
509 2009;5.
  - 510 14. Luo S, Lu JY, Liu L, Yin Y, Chen C, Han X, et al. Divergent lncRNAs regulate gene  
511 expression and lineage differentiation in pluripotent cells. *Cell Stem Cell. Cell Press*;  
512 2016;18:637–52.
  - 513 15. Cabianca DS, Casa V, Bodega B, Xynos A, Ginelli E, Tanaka Y, et al. A long ncRNA  
514 links copy number variation to a polycomb/trithorax epigenetic switch in fshd muscular  
515 dystrophy. *Cell*. 2012;149:819–31.
  - 516 16. Engreitz JM, Haines JE, Perez EM, Munson G, Chen J, Kane M, et al. Local regulation  
517 of gene expression by lncRNA promoters, transcription and splicing. *Nature*. *Nature*

518 Publishing Group; 2016;539:452–5.

1  
2 519 17. Anderson KM, Anderson DM, McAnally JR, Shelton JM, Bassel-Duby R, Olson EN.

3  
4 520 Transcription of the non-coding RNA upperhand controls Hand2 expression and heart

5  
6 521 development. *Nature*. Nature Publishing Group; 2016;539:433–6.

7  
8 522 18. Wang KC, Yang YW, Liu B, Sanyal A, Corces-Zimmerman R, Chen Y, et al. A long

9  
10 523 noncoding RNA maintains active chromatin to coordinate homeotic gene expression. *Nature*.

11  
12 524 2011;472:120–6.

13  
14 525 19. Aitken S, Magi S, Alhendi AMN, Itoh M, Kawaji H, Lassmann T, et al. Transcriptional

15  
16 526 Dynamics Reveal Critical Roles for Non-coding RNAs in the Immediate-Early Response.

17  
18 527 Thieffry D, editor. *PLOS Comput Biol*. Public Library of Science; 2015;11:e1004217.

19  
20 528 20. Arner E, Daub CO, Vitting-Seerup K, Andersson R, Lilje B, Drabløs F, et al. Transcribed

21  
22 529 enhancers lead waves of coordinated transcription in transitioning mammalian cells. *Science*

23  
24 530 (80- ). 2015;347:1010 LP – 1014.

25  
26 531 21. De Santa F, Barozzi I, Mietton F, Ghisletti S, Polletti S, Tusi BK, et al. A Large Fraction

27  
28 532 of Extragenic RNA Pol II Transcription Sites Overlap Enhancers. Mattick JS, editor. *PLoS*

29  
30 533 *Biol*. Public Library of Science; 2010;8:e1000384.

31  
32 534 22. Stein GH. T98G: An anchorage-independent human tumor cell line that exhibits

33  
34 535 stationary phase G1 arrest in vitro. *J Cell Physiol*. John Wiley & Sons, Ltd; 1979;99:43–54.

35  
36 536 23. Tullai JW, Schaffer ME, Mullenbrock S, Sholder G, Kasif S, Cooper GM. Immediate-early

37  
38 537 and delayed primary response genes are distinct in function and genomic architecture. *J Biol*

39  
40 538 *Chem*. American Society for Biochemistry and Molecular Biology; 2007;282:23981–95.

41  
42 539 24. Takahashi Y, Rayman JB, Dynlacht BD. Analysis of promoter binding by the E2F and

43  
44 540 pRB families in vivo: distinct E2F proteins mediate activation and repression. *Genes Dev*.

45  
46 541 Cold Spring Harbor Laboratory Press; 2000;14:804–16.

47  
48 542 25. Canhoto AJ, Chestukhin A, Litovchick L, DeCaprio JA. Phosphorylation of the

49  
50 543 retinoblastoma-related protein p130 in growth-arrested cells. *Oncogene*. Nature Publishing

51  
52 544 Group; 2000;19:5116–22.

53  
54 545 26. Schlackow M, Nojima T, Gomes T, Dhir A, Carmo-Fonseca M, Proudfoot NJ. Distinctive

- 546 Patterns of Transcription and RNA Processing for Human lincRNAs. *Mol Cell. Cell Press*;  
1  
2 547 2017;65:25–38.  
3  
4 548 27. Preker P, Nielsen J, Kammler S, Lykke-Andersen S, Christensen MS, Mapendano CK, et  
5  
6 549 al. RNA exosome depletion reveals transcription upstream of active human promoters.  
7  
8 550 *Science*. American Association for the Advancement of Science; 2008;322:1851–4.  
9  
10 551 28. Zeisel A, Kostler WJ, Molotski N, Tsai JM, Krauthgamer R, Jacob-Hirsch J, et al.  
11  
12 552 Coupled pre-mRNA and mRNA dynamics unveil operational strategies underlying  
13  
14 553 transcriptional responses to stimuli. *Mol Syst Biol*. EMBO Press; 2014;7:529–529.  
15  
16 554 29. La Manno G, Soldatov R, Zeisel A, Braun E, Hochgerner H, Petukhov V, et al. RNA  
17  
18 555 velocity of single cells. *Nature*. Nature Publishing Group; 2018. p. 494–8.  
19  
20 556 30. Gaidatzis D, Burger L, Florescu M, Stadler MB. Analysis of intronic and exonic reads in  
21  
22 557 RNA-seq data characterizes transcriptional and post-transcriptional regulation. *Nat*  
23  
24 558 *Biotechnol*. Nature Publishing Group; 2015;33:722–9.  
25  
26 559 31. Jonkers I, Kwak H, Lis JT. Genome-wide dynamics of Pol II elongation and its interplay  
27  
28 560 with promoter proximal pausing, chromatin, and exons. *Elife*. eLife Sciences Publications  
29  
30 561 Ltd; 2014;2014.  
31  
32 562 32. Tennyson CN, Klamut HJ, Worton RG. The human dystrophin gene requires 16 hours to  
33  
34 563 be transcribed and is cotranscriptionally spliced. *Nat Genet*. 1995;9:184–90.  
35  
36 564 33. Fuchs G, Voichek Y, Benjamin S, Gilad S, Amit I, Oren M. 4sUDRB-seq: measuring  
37  
38 565 genomewide transcriptional elongation rates and initiation frequencies within cells. *Genome*  
39  
40 566 *Biol*. 2014;15:R69.  
41  
42 567 34. Angel P, Karin M. The role of Jun, Fos and the AP-1 complex in cell-proliferation and  
43  
44 568 transformation. *BBA - Rev. Cancer*. 1991.  
45  
46 569 35. Ernst J, Kheradpour P, Mikkelsen TS, Shores N, Ward LD, Epstein CB, et al. Mapping  
47  
48 570 and analysis of chromatin state dynamics in nine human cell types. *Nature*. 2011;473:43–9.  
49  
50 571 36. Kundaje A, Meuleman W, Ernst J, Bilenky M, Yen A, Heravi-Moussavi A, et al.  
51  
52 572 Integrative analysis of 111 reference human epigenomes. *Nature*. Nature Publishing Group;  
53  
54 573 2015;518:317–30.  
55  
56  
57  
58  
59  
60  
61  
62  
63  
64  
65

- 574 37. Wotton D, Lo RS, Lee S, Massagué J. A Smad transcriptional corepressor. *Cell*. 1999;
- 1  
2 575 38. Rabani M, Raychowdhury R, Jovanovic M, Rooney M, Stumpo DJ, Pauli A, et al. High-  
3  
4 576 resolution sequencing and modeling identifies distinct dynamic RNA regulatory strategies.  
5  
6 577 *Cell*. 2014;
- 8  
9 578 39. Schaukowitch K, Joo J-Y, Liu X, Watts JK, Martinez C, Kim T-K. Enhancer RNA  
10  
11 579 Facilitates NELF Release from Immediate Early Genes. *Mol Cell*. *Cell Press*; 2014;56:29–  
12  
13 580 42.
- 14  
15 581 40. Struhl K. Transcriptional noise and the fidelity of initiation by RNA polymerase II. *Nat*  
16  
17 582 *Struct Mol Biol*. 2007;14:103–5.
- 19  
20 583 41. Wang J, Zhang J, Zheng H, Li J, Liu D, Li H, et al. Neutral evolution of ‘non-coding’  
21  
22 584 complementary DNAs. *Nature*. *Nature Publishing Group*; 2004;431:1–2.
- 23  
24 585 42. Palazzo AF, Lee ES. Non-coding RNA: what is functional and what is junk? *Front Genet*.  
25  
26 586 *Frontiers*; 2015;6:2.
- 28  
29 587 43. Hacisuleyman E, Goff LA, Trapnell C, Williams A, Henao-Mejia J, Sun L, et al.  
30  
31 588 Topological organization of multichromosomal regions by the long intergenic noncoding RNA  
32  
33 589 *Firre*. *Nat Struct Mol Biol*. 2014;21:198–206.
- 34  
35 590 44. Dimitrova N, Zamudio JR, Jong RM, Soukup D, Resnick R, Sarma K, et al. LincRNA-p21  
36  
37 591 Activates p21 In cis to Promote Polycomb Target Gene Expression and to Enforce the G1/S  
38  
39 592 Checkpoint. *Mol Cell*. *Cell Press*; 2014;54:777–90.
- 41  
42 593 45. Sauvageau M, Goff LA, Lodato S, Bonev B, Groff AF, Gerhardinger C, et al. Multiple  
43  
44 594 knockout mouse models reveal lincRNAs are required for life and brain development. *Elife*.  
45  
46 595 2013;2013.
- 48  
49 596 46. Heinz S, Romanoski CE, Benner C, Glass CK. The selection and function of cell type-  
50  
51 597 specific enhancers. *Nat. Rev. Mol. Cell Biol*. *Nature Publishing Group*; 2015. p. 144–54.
- 52  
53 598 47. Goudarzi M, Berg K, Pieper LM, Schier AF. Individual long non-coding RNAs have no  
54  
55 599 overt functions in zebrafish embryogenesis, viability and fertility. *Elife*. *NLM (Medline)*;  
56  
57 600 2019;8.
- 59  
60 601 48. Paralkar VR, Taborda CC, Huang P, Yao Y, Kossenkov AV, Prasad R, et al. Unlinking  
61  
62  
63  
64  
65



- 602 an lncRNA from its associated cis element. *Mol Cell*. Cell Press; 2016;62:104–10.
- 1  
2 603 49. Martin M. Cutadapt removes adapter sequences from high-throughput sequencing  
3  
4 604 reads. *EMBnet.journal*. 2011;17:10.  
5
- 6 605 50. Dobin A, Davis CA, Schlesinger F, Drenkow J, Zaleski C, Jha S, et al. STAR: ultrafast  
7  
8 606 universal RNA-seq aligner. *Bioinformatics*. Narnia; 2013;29:15–21.  
9
- 10  
11 607 51. Liao Y, Smyth GK, Shi W. featureCounts: an efficient general purpose program for  
12  
13 608 assigning sequence reads to genomic features. *Bioinformatics*. Narnia; 2014;30:923–30.  
14
- 15 609 52. Love MI, Huber W, Anders S. Moderated estimation of fold change and dispersion for  
16  
17 610 RNA-seq data with DESeq2. *Genome Biol*. BioMed Central Ltd.; 2014;15.  
18
- 19  
20 611 53. Chechik G, Koller D. Timing of Gene Expression Responses to Environmental Changes.  
21  
22 612 *J Comput Biol*. Mary Ann Liebert, Inc. 2 Madison Avenue Larchmont, NY 10538 USA;  
23  
24 613 2009;16:279–90.  
25
- 26 614 54. Bernstein BE, Stamatoyannopoulos JA, Costello JF, Ren B, Milosavljevic A, Meissner A,  
27  
28 615 et al. The NIH roadmap epigenomics mapping consortium. *Nat. Biotechnol*. 2010. p. 1045–8.  
29  
30 616 55. Lahiri SN. Resampling methods for dependent data. Springer Science & Business  
31  
32 617 Media; 2013.  
33  
34  
35 618  
36  
37  
38 619  
39  
40  
41  
42  
43  
44  
45  
46  
47  
48  
49  
50  
51  
52  
53  
54  
55  
56  
57  
58  
59  
60  
61  
62  
63  
64  
65

620 **Figure Legends**

1  
2 621 **Figure 1. Protein-coding genes and lncRNAs exhibit distinct expression**

3  
4 622 **dynamics**

5  
6  
7 623 **a**, Schematic representation of the experimental design. Following stimulation, cells  
8  
9 624 were harvested at evenly spaced 10-minute intervals, yielding a total of 41 time  
10  
11 625 points. **b**, Heatmap of lncRNA expression. Each row represents an individual z-score  
12  
13 626 normalized lncRNA expression profile. Colored bars indicate six clusters obtained  
14  
15 627 through K-means cluster analysis. **c**, Heatmap of mRNA expression, as in **b**. **d**,  
16  
17 628 Comparison of lncRNA and mRNA cluster centroids. Outer boxes display cluster  
18  
19 629 centroids, capturing the mean expression of all cluster members. Shaded regions  
20  
21 630 representing the 5<sup>th</sup>-95<sup>th</sup> percentiles of all cluster member expression profiles.  
22  
23 631 Pearson's correlation coefficients, displayed in the center boxes, were calculated  
24  
25 632 between all lncRNA and mRNA centroid expression profiles.  
26  
27  
28  
29  
30

31 633

32  
33  
34 634 **Figure 2. Gene-specific degradation rates shape mRNA dynamics**

35  
36 635 **a-g**, Pre-mRNA (top panels) and mRNA expression profiles (bottom panels) of seven  
37  
38 636 representative genes with rapid pre-mRNA dynamics. Pre-mRNA and mRNA  
39  
40 637 expression profiles (points) were obtained by quantification of RNA-seq reads  
41  
42 638 mapping to gene introns and exons respectively. Pre-mRNA expression profiles are  
43  
44 639 overlaid with impulse model fits (lines) to aid visualization. mRNA expression profiles  
45  
46 640 are overlaid with the transcription model fits (lines) used to obtain gene-specific  
47  
48 641 mRNA half-lives, presented in **h**.  
49  
50

51 642

52  
53  
54  
55 643 **Figure 3. Gene length delays mRNA production**

644 **a**, Transcription across the *CACNA1C* gene body. Ridges display normalized RNA-  
645 seq coverage over 1 kb intervals tiled across *CACNA1C* introns. Color intensity  
646 indicates the scaled expression of each 1 kb interval across the time course. A right-  
647 facing arrow at the 5' end of the gene schematic (top) indicates the direction of  
648 transcription. **b-e**, mRNA and pre-mRNA expression dynamics for four genes of  
649 varying length. Pre-mRNA expression is shown for the first and last 10 kb of each  
650 gene's introns, indicated above each gene schematic (top) by blue and red  
651 horizontal bars respectively. The approximate delay between transcription of the first  
652 and last 10 kb of pre-mRNA is indicated by a left-right arrow between the two  
653 expression profile peaks. Expression profiles are overlaid with impulse model fits  
654 (lines) and scaled to values between zero and one to facilitate visual comparison.

655

#### 656 **Figure 4. mRNA expression fails to capture gene induction dynamics**

657 **a**, Heatmap of protein-coding gene induction dynamics. Expression profiles were  
658 captured using the first 10 kb of gene introns and z-score normalized. Colored bars  
659 (left) indicate cluster membership to one of six clusters obtained through K-means  
660 cluster analysis. **b**, Heatmap of protein-coding mRNA expression dynamics. Rows  
661 within each expression cluster are ranked by the time of peak expression. Rows  
662 within **a** and **b** correspond to the same genes. **c**, Comparison of protein-coding gene  
663 pre-mRNA and lncRNA expression dynamics. lncRNA cluster centroids (left) are the  
664 same as in Fig. 1B, while protein-coding pre-mRNA centroids (top) correspond to the  
665 colored bars in **b**. Centroids represent the mean expression of all cluster members,  
666 while shaded regions represent the 5<sup>th</sup>-95<sup>th</sup> percentiles. Pearson correlation  
667 coefficients calculated between all lncRNA and protein-coding pre-mRNA centroids  
668 are presented.

669 **Figure 5. Human lncRNAs mirror adjacent protein-coding gene pre-mRNA**

670 **expression**

671 **a-c**, NIH Roadmap Epigenomics data for loci surrounding protein coding genes;  
672 FOS, TGFBI and TGIF1. A schematic of each loci is presented with GENCODE-  
673 annotated protein-coding genes shown in black and lncRNAs in green. NIH  
674 Roadmap Epigenomics DNase-seq, H3K4me1 and H3K4me3 histone modification  
675 ChIP-seq data from 111 uniformly processed human epigenomes is presented. Lines  
676 depict mean  $-\log_{10}(\text{p-value})$  signal, with dark shaded regions indicating 25%-75%  
677 percentiles, and lighter shaded regions the 10%-90% percentiles. **d-f**, Line plots of Z-  
678 score normalized protein-coding gene and lncRNA expression values. lncRNA and  
679 pre-mRNA was quantified using the expression of the first 10 kb of intronic regions.  
680 Mean expression (dark green) and the range of all expression values (shaded light  
681 green) is shown for adjacent lncRNAs. Mature mRNA expression is included for  
682 comparison.

683

684 **Figure 6. Human lncRNAs mirror adjacent protein-coding gene expression**

685 **a**, Violin plot of Pearson's correlation coefficients between protein-coding gene and  
686 lncRNA expression profiles, binned by distance between transcripts. A generalized  
687 additive model (GAM) fit summarizes the relationship between distance and  
688 correlation of protein-coding/lncRNA pairs (e.d.f.=8.197,  $P < 2e-16$ ). A simulation  
689 envelope, generated using a block-bootstrap approach (see Methods), demonstrates  
690 the expected trend under the null hypothesis that distance and correlation are  
691 unrelated. The trend in correlation against separation distance lies well outside the  
692 simulation envelope indicating a relationship unlikely to be due to chance.

693 Continuous GAM fit and simulation envelope values were overlaid by plotting the

694 mean of each distance bin. **b**, Similarity between expression profiles of  
1  
2 695 coding/lncRNA distance-binned pairs, at time lags of -200 to 200 minutes. Solid lines  
3  
4 696 represent the mean correlation coefficient calculated between distance-binned pairs  
5  
6 697 at varying time-lags of lncRNA expression profiles relative to coding gene  
7  
8  
9 698 expression. Simulation envelopes generated using a block bootstrap approach show  
10  
11 699 the expected cross correlations versus time trends where there is no relationship  
12  
13 700 with separation distance. **c**, produced as in **b**, with coding gene expression profiles  
14  
15 701 replaced with mature mRNA expression, rather than pre-mRNA.  
16  
17  
18  
19  
20  
21

702

### 703 **Figure 7. Murine lncRNAs mirror adjacent protein-coding gene expression**

704 Spatial and temporal relationship between protein-coding genes and lncRNAs  
24  
25  
26 705 activated in mouse dendritic cells responding to stimulation with  
27  
28  
29 706 lipopolysaccharide[38].**a**, Violin plot of Pearson's correlation coefficients between  
30  
31 707 protein-coding gene and lncRNA expression profiles, binned by distance between  
32  
33 708 transcripts. A GAM fit summarizes the relationship between distance and correlation  
34  
35 709 of mouse protein-coding/lncRNA pairs (e.d.f.=7.007,  $P < 2e-16$ ). A simulation  
36  
37 710 envelope, generated using a block-bootstrap approach (see Methods), demonstrates  
38  
39 711 the expected trend under the null hypothesis that distance and correlation are  
40  
41 712 unrelated. The trend in correlation against separation distance lies well outside the  
42  
43 713 simulation envelope indicating a relationship unlikely to be due to chance.  
44  
45  
46 714 Continuous GAM fit and simulation envelope values were overlaid by plotting the  
47  
48  
49 715 mean of each distance bin. **b**, Similarity between expression profiles of  
50  
51 716 coding/lncRNA distance-binned pairs, at time lags of -90 to 90 minutes. Solid lines  
52  
53 717 represent the mean correlation coefficient calculated between distance-binned pairs  
54  
55 718 at varying time-lags of lncRNA expression profiles relative to coding gene  
56  
57  
58  
59  
60  
61  
62  
63  
64  
65

719 expression. Simulation envelopes generated using a block bootstrap approach show  
720 the expected cross correlations versus time trends where there is no relationship  
721 with separation distance. **c**, produced as in **b**, with coding gene expression profiles  
722 replaced with mature mRNA expression, rather than pre-mRNA.

723

# Figure 1

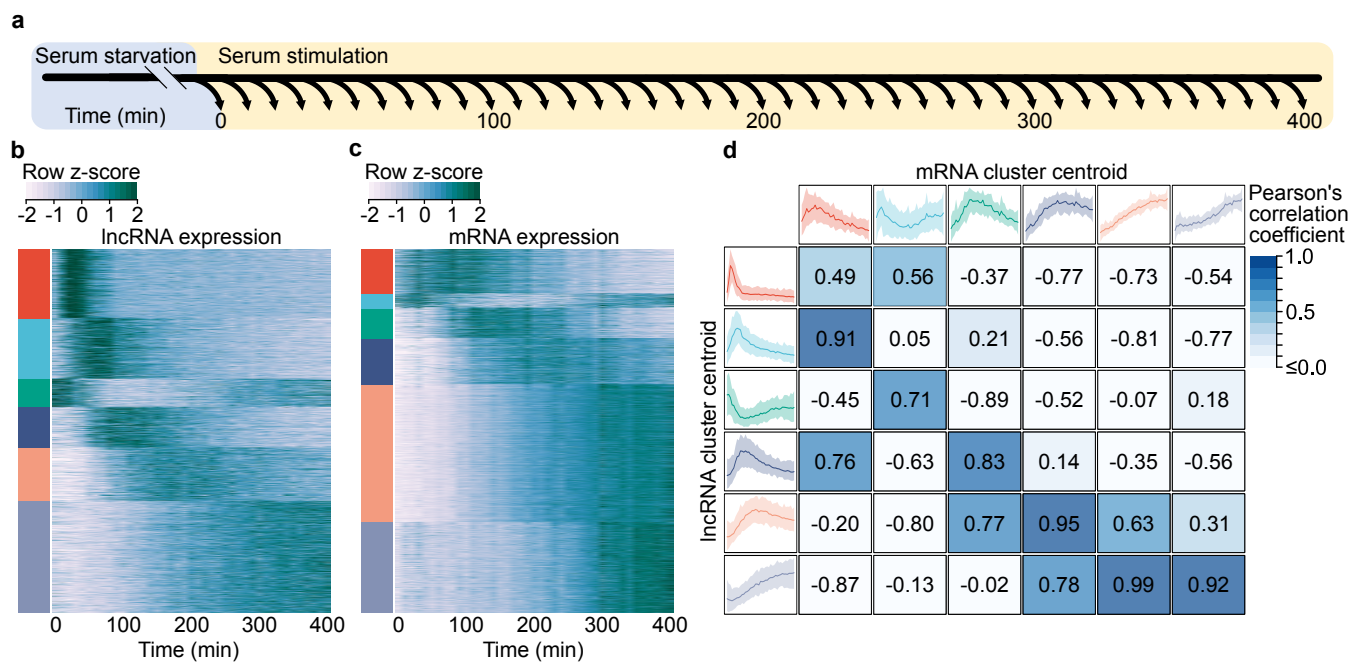



## Figure 2

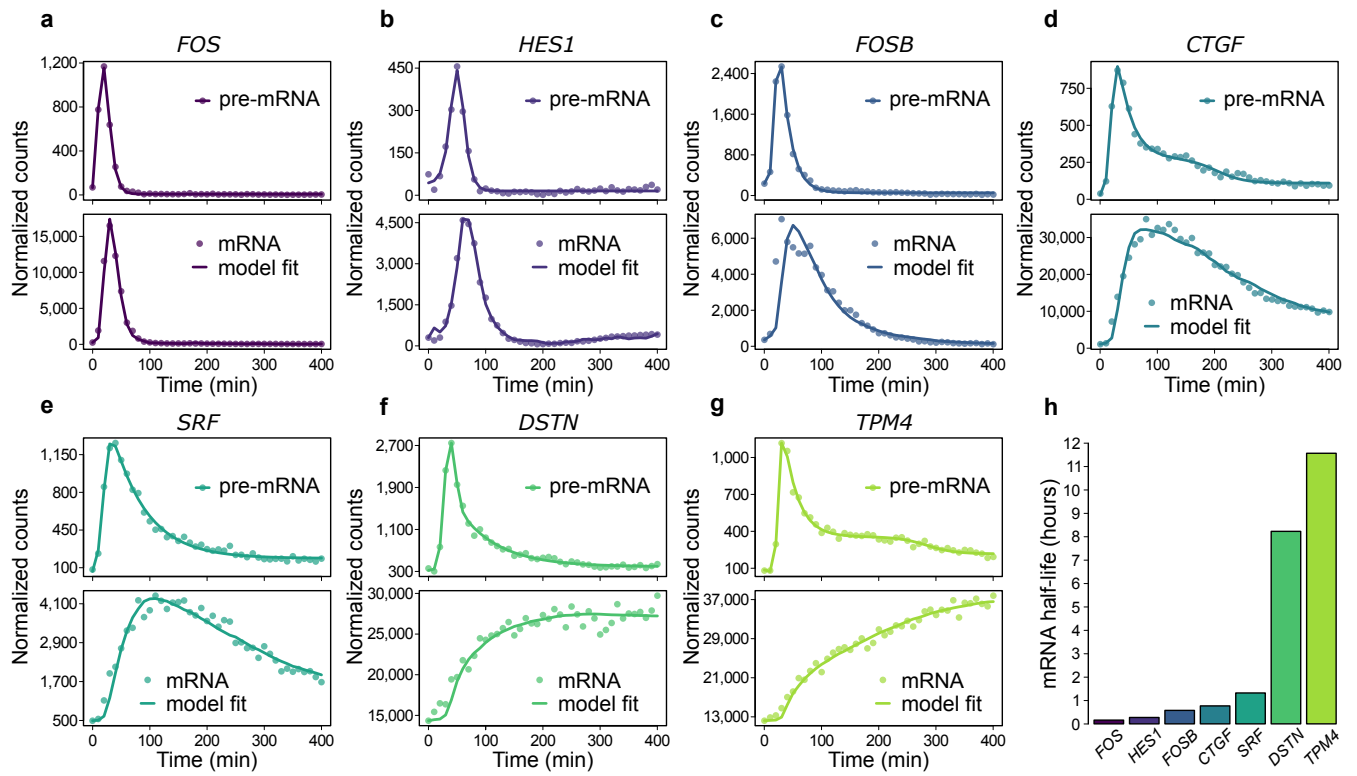

## Figure 3

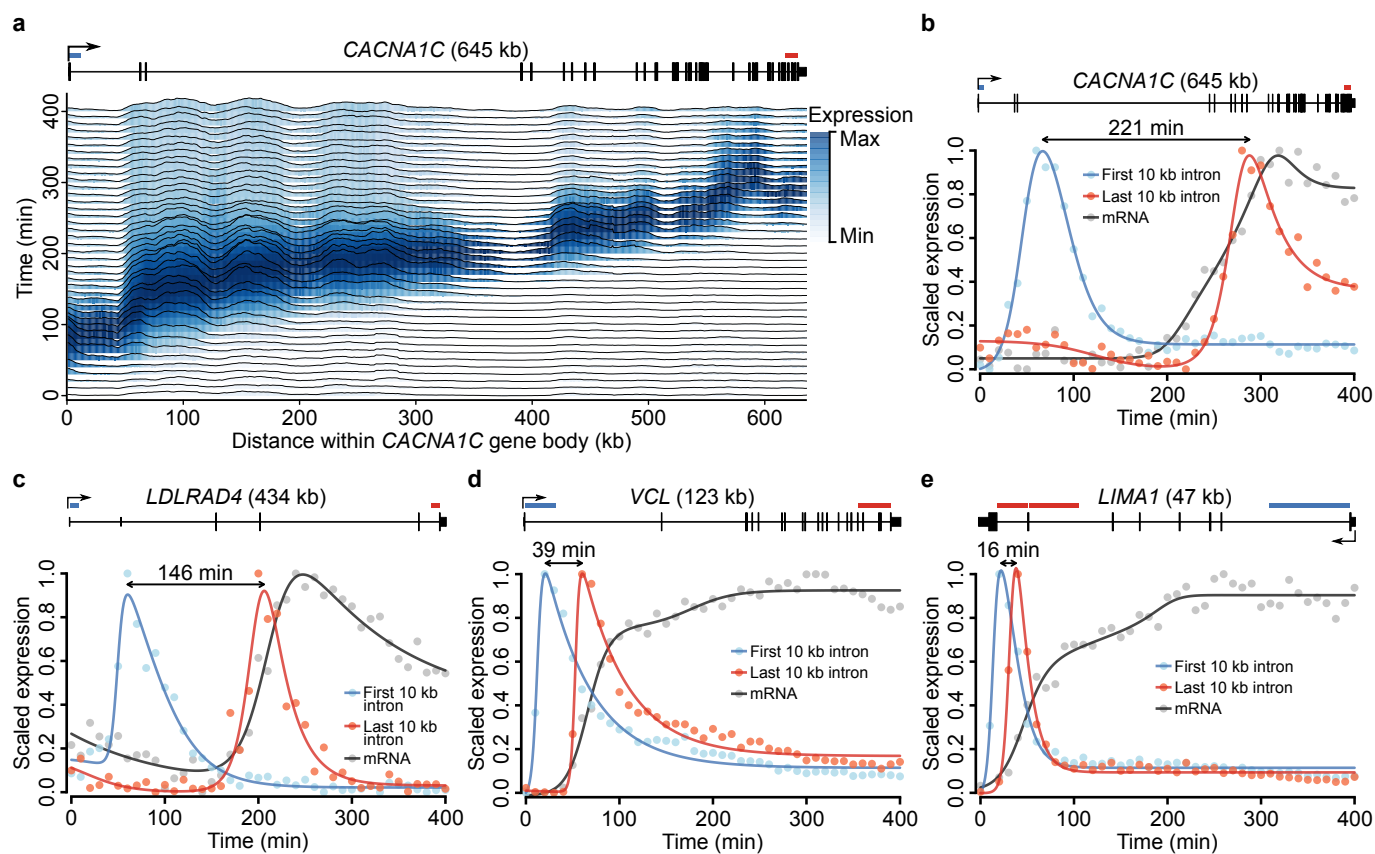

## Figure 4

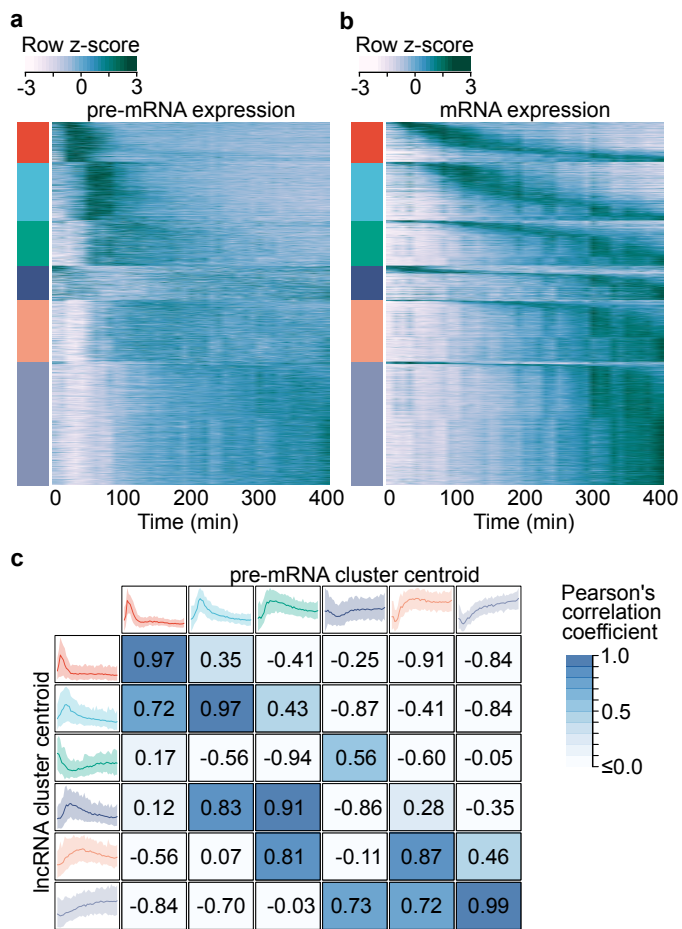

## Figure 5

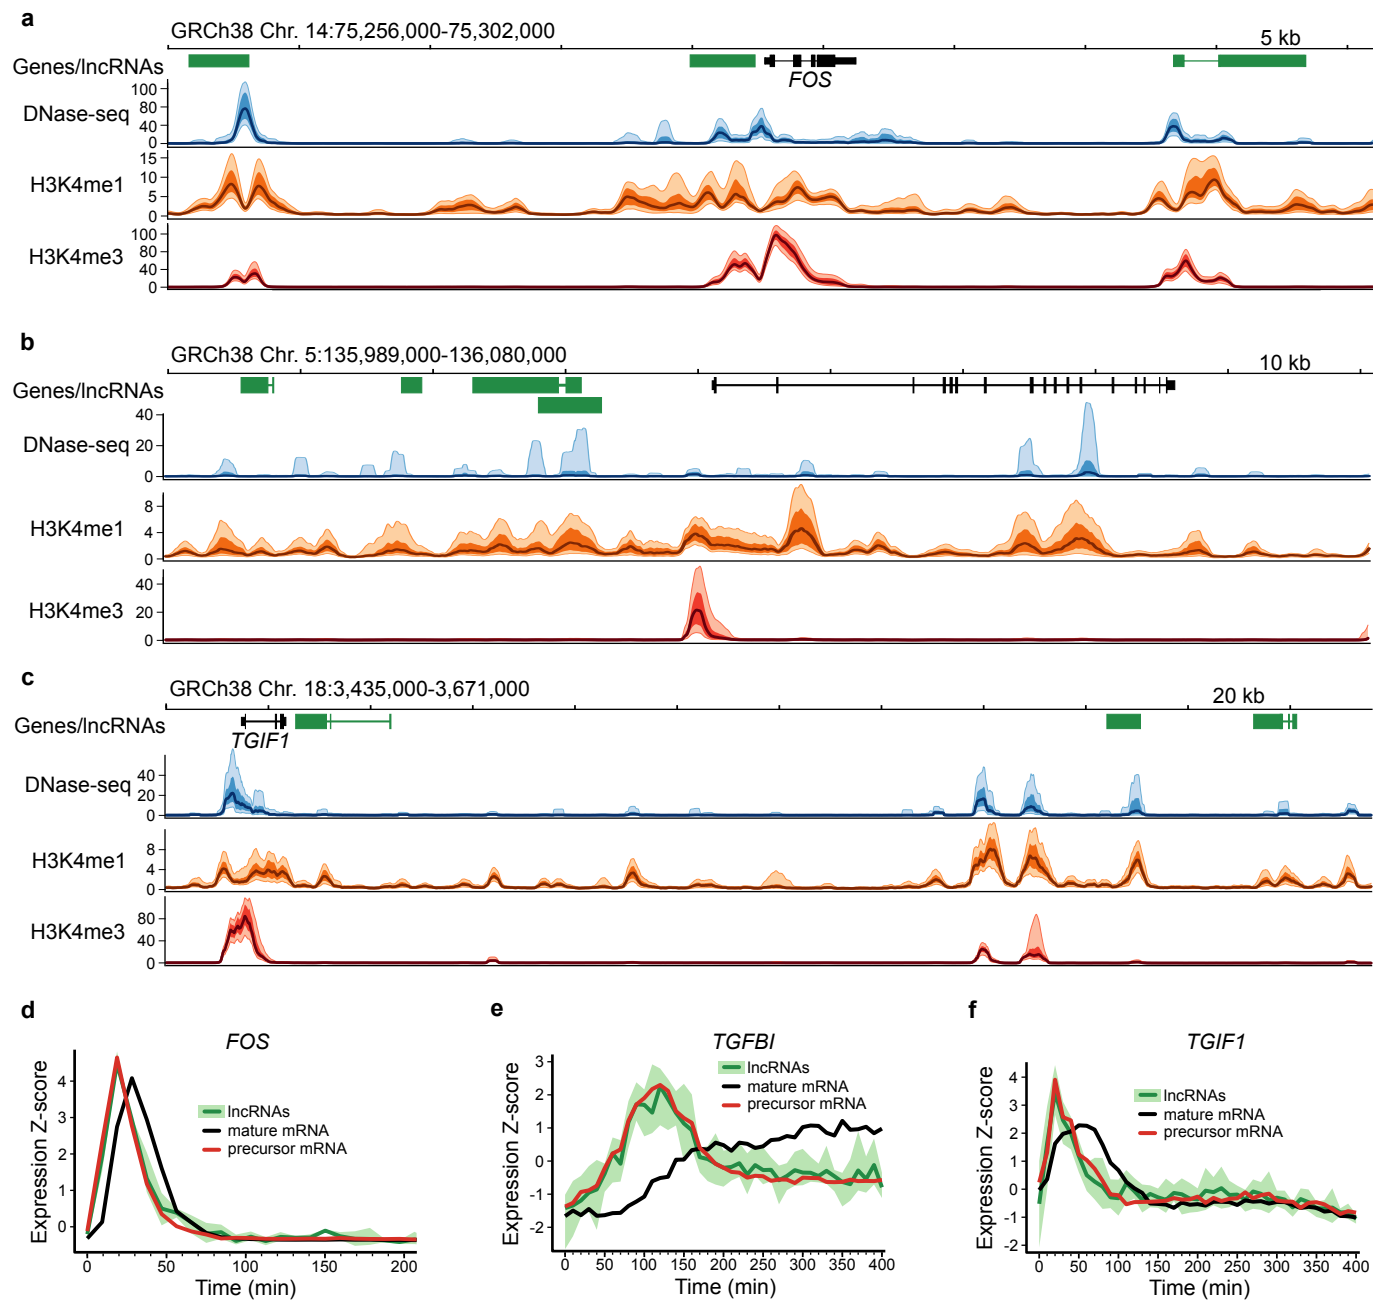

# Figure 6

**a**

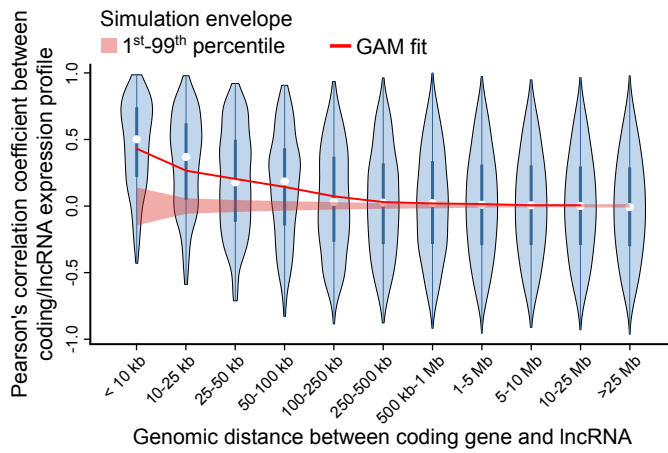

**b**

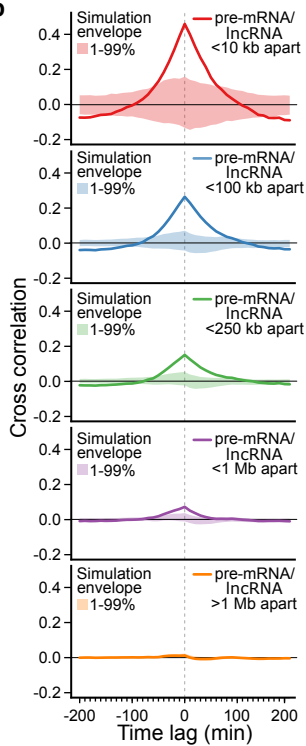

**c**

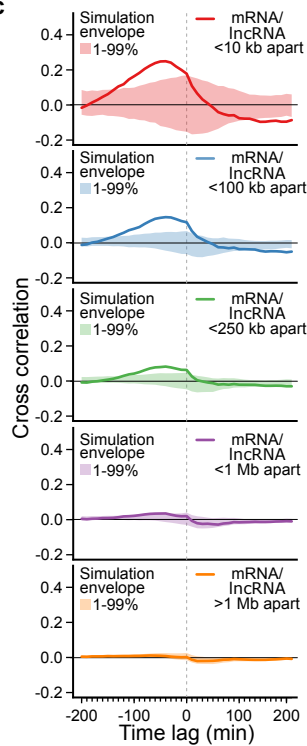

# Figure 7

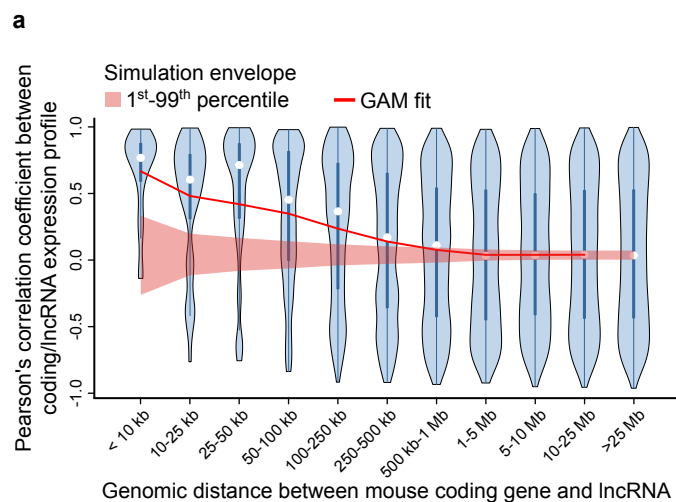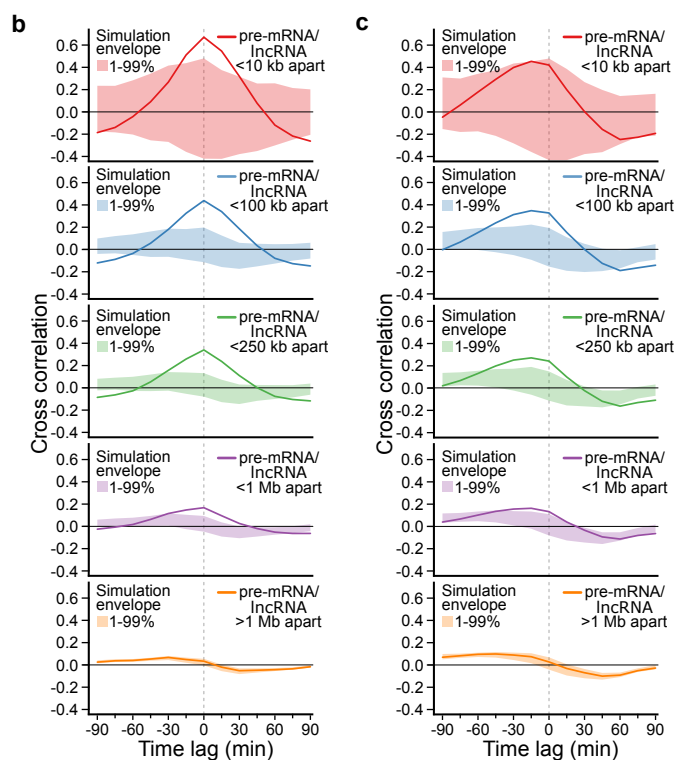

1 **SUPPLEMENTARY FIGURES**

2

3 **TITLE:** High temporal resolution RNA-seq time course data reveals mammalian lncRNA

4 activation mirrors neighbouring protein-coding genes

5

6

7

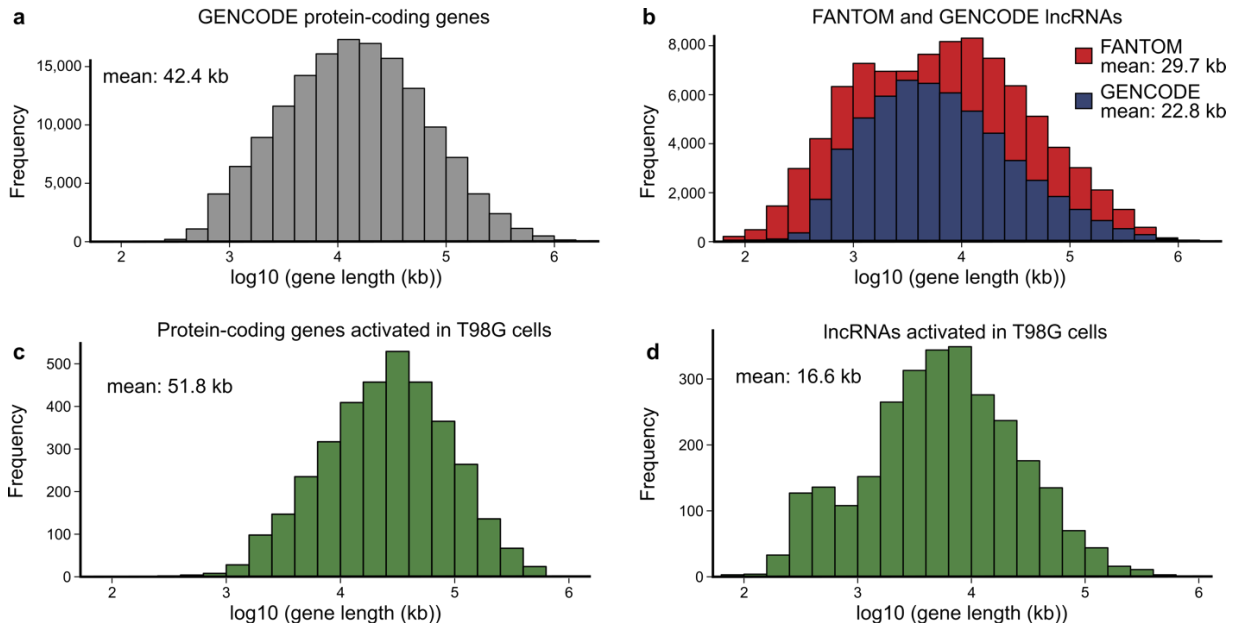

8

9 **Supplementary Figure 1. lncRNA and protein-coding gene length**

10 **a**, Histogram showing the distribution of lengths for all protein-coding transcripts in

11 the GENCODE Human Release 29 annotation. **b**, Lengths of all lncRNA transcripts

12 in the FANTOM CAGE associated transcriptome and GENCODE Human Release 29

13 annotations. **c**, Lengths of all protein-coding genes and **d**, lncRNAs activated in

14 human T98G cells in response to serum stimulation.

15



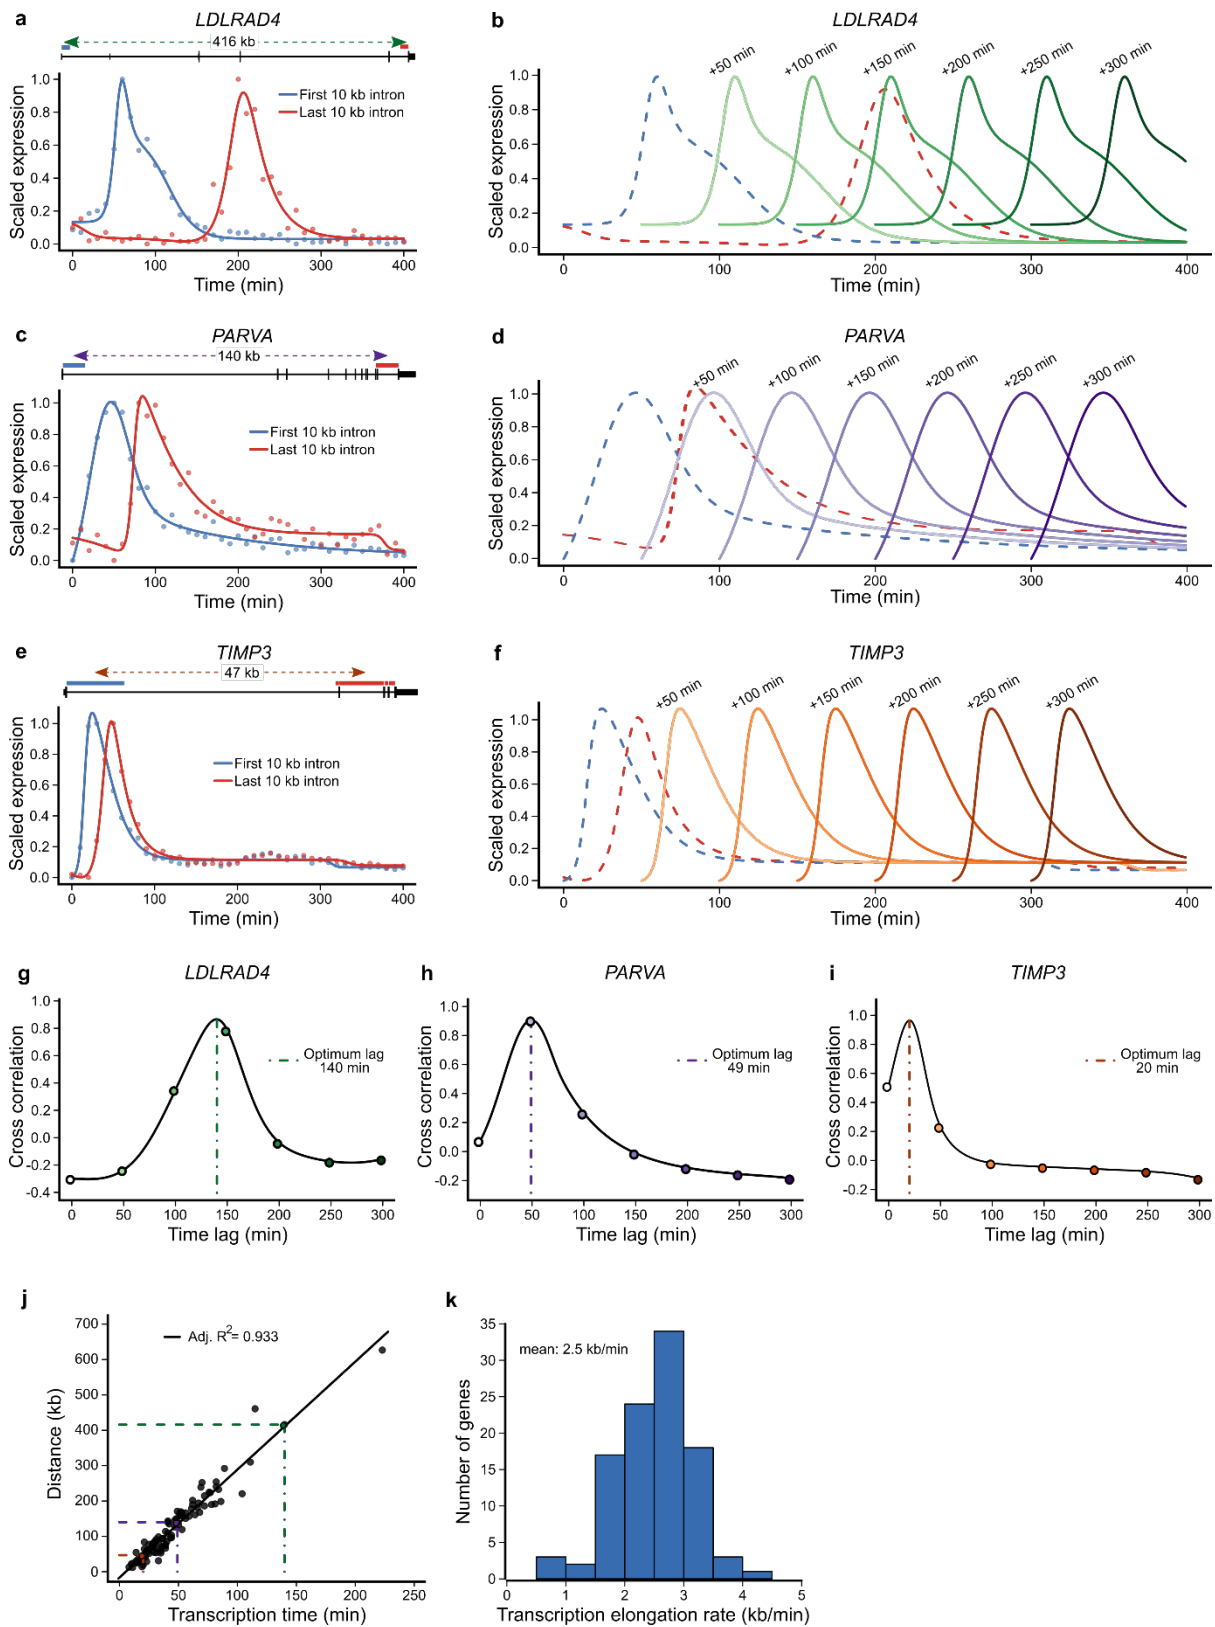

16  
17

18 **Supplementary Figure 2. Estimation of the human RNA polymerase II**  
19 **transcription elongation rate**

20 **a,c,e**, Expression dynamics of the first and last 10 kb of pre-mRNA for three genes  
21 of different length. Lines represent impulse model fits to the normalized expression  
22 estimates obtained through RNA-seq (points). Included above are schematic  
23 illustrations of the three genes *LDLRAD4*, *PARVA* and *TIMP3*, blue and red  
24 horizontal bars indicating the regions of intron used to quantify the first and last 10 kb  
25 of pre-mRNA respectively. Distance labels indicate the distance between the centers  
26 of the first/last 10 kb intervals. **b,d,f**, Impulse model fits to the pre-mRNA expression  
27 dynamics of the three genes as in **a**, **c** and **e** with time-lagged copies of the first 10  
28 kb of pre-mRNA overlaid at intervals of 50 min. **g-i**, Lagged correlations between the  
29 first and last 10 kb of each gene's pre-mRNA, obtained by keeping the expression  
30 profile of the last 10 kb of pre-mRNA constant and shifting the expression profile of  
31 the first 10 kb of pre-mRNA from 0 to 300 min. Filled circles correspond to the time  
32 lags overlaid in **b**, **d** and **f**. Vertical lines indicate the time lag at which the correlation  
33 between the expression profile of the last 10 kb of pre-mRNA and the lagged  
34 expression profile of the first 10 kb of pre-mRNA is maximal. **j**, Scatterplot of the  
35 relationship between transcription time and genomic distance with linear model fit  
36 overlaid. Colored circles correspond to the transcription times and distances of the  
37 three genes presented in **a-i**. **k**, Histogram showing the distribution of transcription  
38 elongation rates.

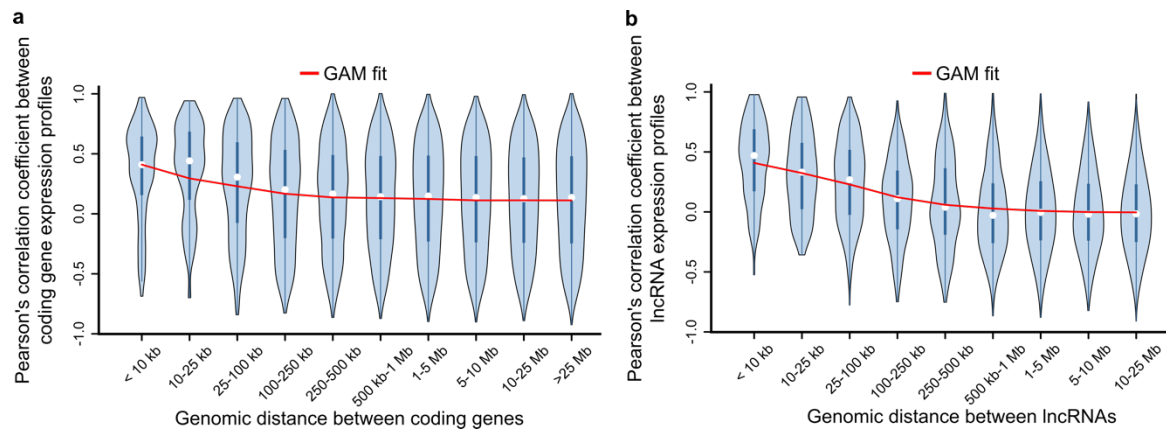

39  
40

41 **Supplementary Figure 3. Correlated expression amongst adjacent protein-**  
42 **coding genes and lncRNAs**

43 **a**, Violin plot of Pearson correlation coefficients between protein-coding gene  
44 expression profiles, binned by the genomic distance between genes. The overlaid  
45 generalized additive model (GAM) fit summarizes the trend between distance and  
46 pre-mRNA expression correlation between coding gene pairs (e.d.f=7.703,  $P < 2e-16$ ).  
47 **b**, Violin plot of Pearson correlation coefficients between lncRNA expression  
48 profiles, binned by the genomic distance between lncRNAs. The overlaid generalized  
49 additive model (GAM) fit summarizes the trend between distance and lncRNA  
50 expression correlation between lncRNA pairs (e.d.f=8.969,  $P < 2e-16$ ).

51

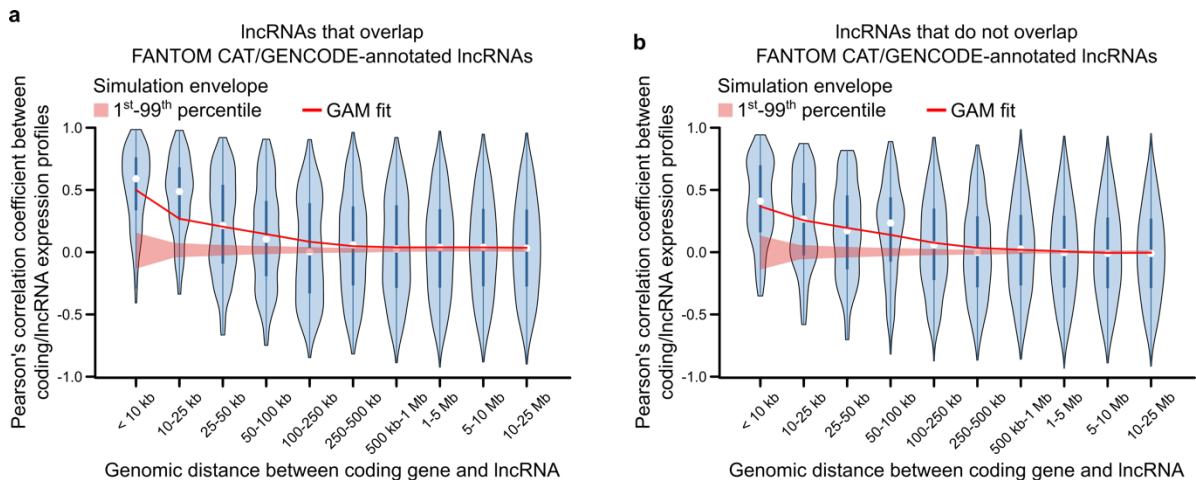

52  
53

#### 54 **Supplementary Figure 4. Correlated expression amongst protein-coding genes**

#### 55 **and lncRNAs with and without overlap of annotated lncRNAs**

56 **a**, Violin plot of Pearson correlation coefficients between the expression profiles of  
57 protein-coding genes and lncRNAs that overlap GENCODE/FANTOM CAT-  
58 annotated lncRNAs, binned by genomic distance. The overlaid GAM fit summarizes  
59 the trend between distance and expression correlation between coding gene/lncRNA  
60 pairs (e.d.f=7.851,  $P < 2e-16$ ). **b**, Violin plot of Pearson correlation coefficients  
61 between expression profiles of protein-coding gene and lncRNAs that do not overlap  
62 annotated lncRNAs. As in **a**, the GAM fit summarizes the trend between distance  
63 and expression correlation of the coding gene/lncRNA pairs (e.d.f=7.964,  $P < 2e-16$ ).
